# Supplementary material for: Renoprotective Effects of Metformin are Independent of Organic Cation Transporters 1 & 2 and AMP-activated Protein Kinase in the Kidney
Source: PubMed Central journal article supplement (PMC5080611; doi:10.1038/srep35952), 2016-10-26
Supplement: srep35952-s1.pdf [file srep35952-s1.pdf]

**Supplementary data from the original manuscript by Christensen et al entitled:**

**Renoprotective Effects of Metformin are Independent of Organic Cation Transporters 1 & 2 and AMP-activated Protein Kinase in the Kidney.**

Michael Christensen<sup>1</sup>, Jonas B. Jensen<sup>1,2</sup>, Steen Jakobsen<sup>2</sup>, Niels Jessen<sup>1</sup>, Jørgen Frøkiær<sup>1,2</sup>, Bruce E. Kemp<sup>3</sup>, Allison L. Marciszyn<sup>4</sup>, Hui Li<sup>4,5</sup>, Núria M. Pastor-Soler<sup>4,5</sup>, Kenneth R. Hallows<sup>4,5</sup> and Rikke Nørregaard<sup>1\*</sup>.

|                            | SHAM        | SHAMmet     | UUO           | UUOmet        |
|----------------------------|-------------|-------------|---------------|---------------|
| <b>Metformin (ng/mL)</b>   | nd          | 2200 ± 36   | nd            | 3289 ± 47     |
| <b>Creatinine (μmol/L)</b> | 8.17 ± 0.28 | 8.17 ± 0.37 | 11.83 ± 0.68* | 11.67 ± 0.77* |
| <b>Urea (mmol/L)</b>       | 8.52 ± 0.55 | 7.15 ± 0.34 | 10.83 ± 0.49* | 9.67 ± 0.43*  |

**Supplementary table 1: Effect of metformin on renal function in response to 3 days unilateral ureteral obstruction.** Plasma metformin, creatinine and urea levels in sham and UUO mice treated with and without metformin.

|                            | WT              | WTmet        | OCT1/2KO     | OCT1/2KOmet   |
|----------------------------|-----------------|--------------|--------------|---------------|
| <b>Metformin (ng/mL)</b>   | nd              | 2892 ± 335   | nd           | 4614 ± 783    |
| <b>Creatinine (μmol/L)</b> | 8.6 ± 0.67      | 8.5 ± 0.39   | 9.5 ± 0.31*  | 12.4 ± 0.61*# |
| <b>Urea (mmol/L)</b>       | 12.08 ± 0.67 ns | 12.27 ± 0.27 | 9.00 ± 0.53* | 9.16 ± 0.63*  |

**Supplementary table 2: Effect of metformin on renal function in response to 3 days unilateral ureteral obstruction in OCT1/2 KO mice.** Plasma metformin, creatinine and urea levels in sham and UOU OCT1/2 KO mice treated with and without metformin.

**Supplementary table 3: QPCR primers sequences.**

| <b>Target</b>                 | <b>Forward primer</b>           | <b>Reverse primer</b>             |
|-------------------------------|---------------------------------|-----------------------------------|
| <b>TNF<math>\alpha</math></b> | 5'- AGGCTGCCCCGACTACGT-3'       | 5'-GACTTTCTCCTGGTATGAGATAGCAAA-3' |
| <b>IL-6</b>                   | 5'- GATGCTACCAAAGTGGATATAATC-3' | 5'-GGTCCTTAGCCACTCCTTCTGTG-3'     |
| <b>IL-1<math>\beta</math></b> | 5'-CAGGCAGGCAGTATCACTCA-3'      | 5'-TGTCCTCATCCTGGAAGGTC-3'        |
| <b>F4/80</b>                  | 5'-TGCTAGTGGAGGCAGTGATG-3'      | 5'-CTGTATTCAACCAGCAGCGA-3'        |
| <b>Itgax</b>                  | 5'-ACTGACCTGGTCTGATTGG-3'       | 5'-CAGCACCTCTGTTCTCCTCC-3'        |
| <b>Mac2</b>                   | 5'-GCTTATCCTGGCTCAACTG C-3'     | 5'-TTCAGTGTGGCCCATGATTGT-3'       |
| <b>KIM1</b>                   | 5'-CGGTACAACCTAAAGGGGCA-3'      | 5'-GACGTGTGGGAATCTCTGGT-3'        |
| <b>Nqo1</b>                   | 5'-CAGATCCTGGAAGGATGGAA-3'      | 5'-TCTGGTTGTCAGCTGGAATG-3'        |
| <b>Vcam1</b>                  | 5'-GTGGTGCTGTGACAATGACC-3'      | 5'-ACGTCAGAACAACCGAATCC-3'        |
| <b>Icam1</b>                  | 5'-TCCAATTCACACTGAATGCC-3'      | 5'-GTCTGCTGAGACCCCTCTTG-3'        |
| <b>MCP1</b>                   | 5'-CAAGAAGGAATGGGTCCAGA-3'      | 5'-GTGCTGAAGACCTTAGGGCA-3'        |
| <b>OCT3</b>                   | 5'-AATATCCTGTTTCGGCGTTG-3'      | 5'-TCACGATCACGAAGCAAGTC-3'        |
| <b>Pmat</b>                   | 5'-GTCTTCTCGCTGCTAATGGG-3'      | 5'-ATGGTGTTCCTGCCAGTTC-3'         |
| <b>Mate1</b>                  | 5'-CTGCTCTTCAGACAGGACCC-3'      | 5'-TGACAAGGTTAGCTGCGATG-3'        |
| <b>Mate2</b>                  | 5'-TCTTCTGCAGCGTTCCTAT-3'       | 5'-CTCCACTCCTGGAAGCACTC-3'        |
| <b>C-Myc</b>                  | 5'-CAACGTCTTGAACGTCAGA-3'       | 5'-TCGTCTGCTTGAATGGACAG-3'        |

# Supplementary figure 1

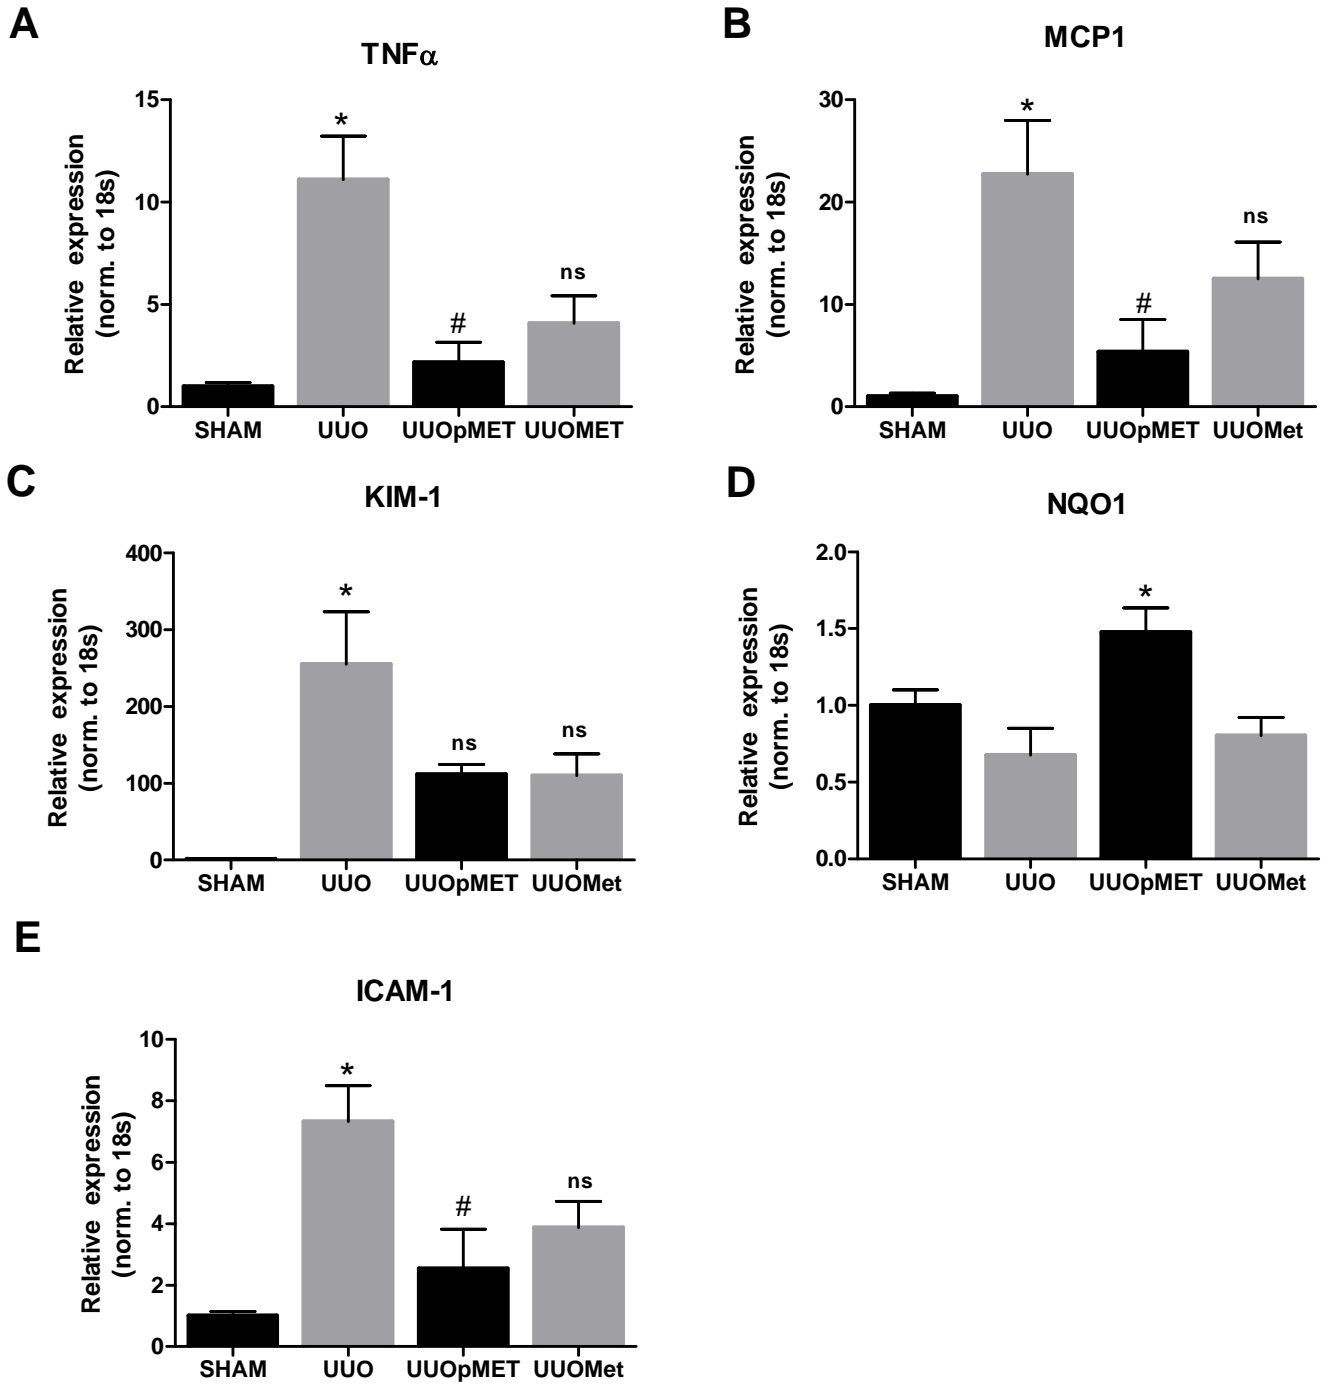

**Supplementary figure 1: The effect of metformin in mice subjected to 3 days unilateral ureteral obstruction (UUO).**

UUO mice were treated with metformin (500 mg/kg/day) after UUO damage. The kidneys were processed for qPCR analysis (n = 4-5 mice in each group) to evaluate the different doses on the expression of inflammatory, injury and oxidative stress markers. Regulation of the inflammatory and injury markers (A) TNF $\alpha$ , (B) MCP1, (C) KIM1, (D) NQO1 and (F) ICAM1 in mice subjected to 3dUUO and metformin treatment normalized to ribosomal 18S RNA. Each bar represents the mean  $\pm$  SEM. \*P<0.05 compared to the sham group. # P<0.05 compared to the UUO group.

Data demonstrated that metformin administered at a dose of 500 mg/kg/day after induction of UUO had some renoprotective effects in mice subjected to 3dUUO.

UUOpMET: UUO mice were pretreated with metformin. UUOMet: UUO mice were treated with metformin after UUO damage.

## Supplementary figure 2

**A**

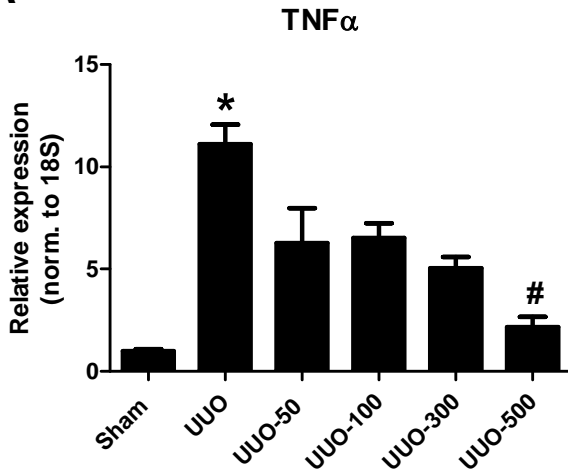

**B**

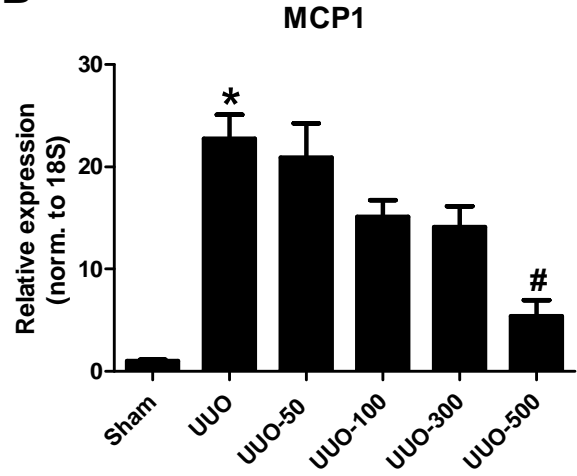

**C**

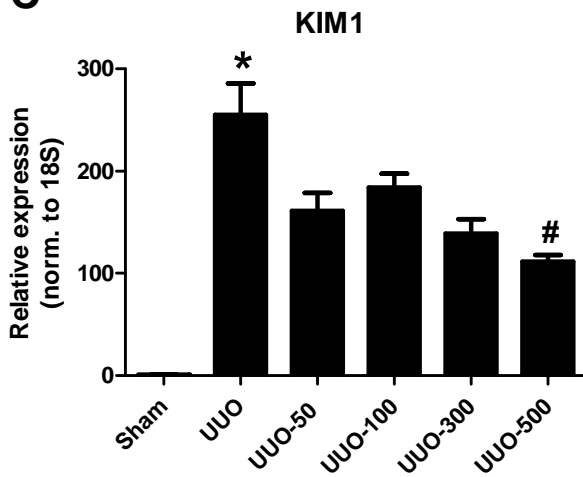

**D**

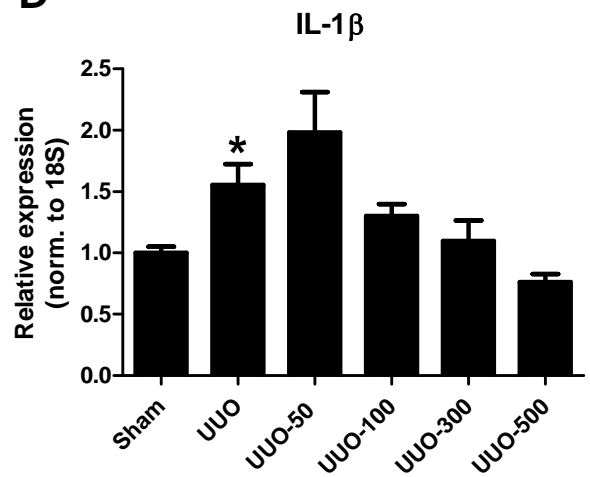

**E**

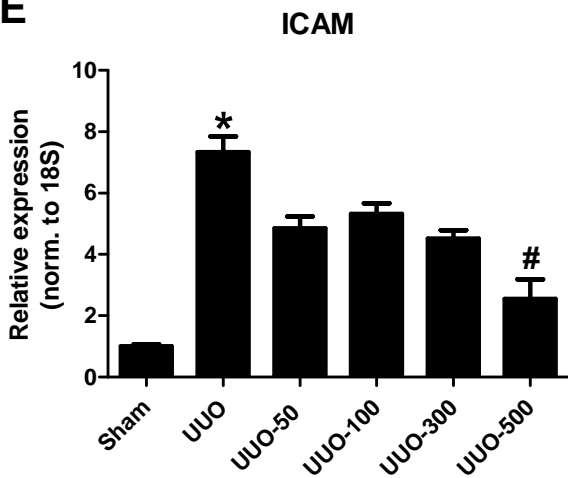

**F**

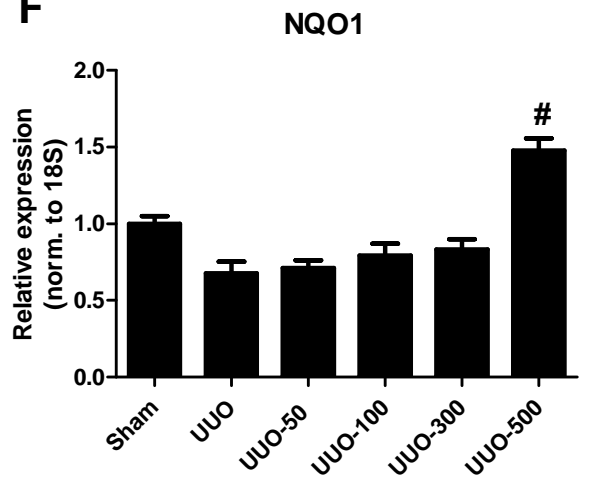

**Supplementary figure 2: Dose-response experiment in mice subjected to 3 days unilateral ureteral obstruction (UUO) with different doses of metformin.**

UUO mice were administered 4 different doses of metformin (50, 100, 300 and 500 mg/kg/day). The kidneys were processed for qPCR analysis (n = 4-5 mice in each group) to evaluate the different doses on the expression of inflammatory, injury and oxidative stress markers. Regulation of the inflammatory and injury markers (A) TNF $\alpha$ , (B) MCP1, (C) KIM1, (D) IL-1 $\beta$ , (E) ICAM and the oxidative stress marker (F) NQO1 in mice subjected to 3dUUO and metformin treatment normalized to ribosomal 18S RNA. Each bar represents the mean  $\pm$  SEM. \*P<0.05 compared to the sham group. # P<0.05 compared to the UUO group.

Data demonstrated that metformin administered at a dose of 500 mg/kg/day reduced significantly renal inflammation, renal injury and oxidative stress in mice subjected to 3dUUO whereas the lower doses had no significant effect.



### Supplementary figure 3

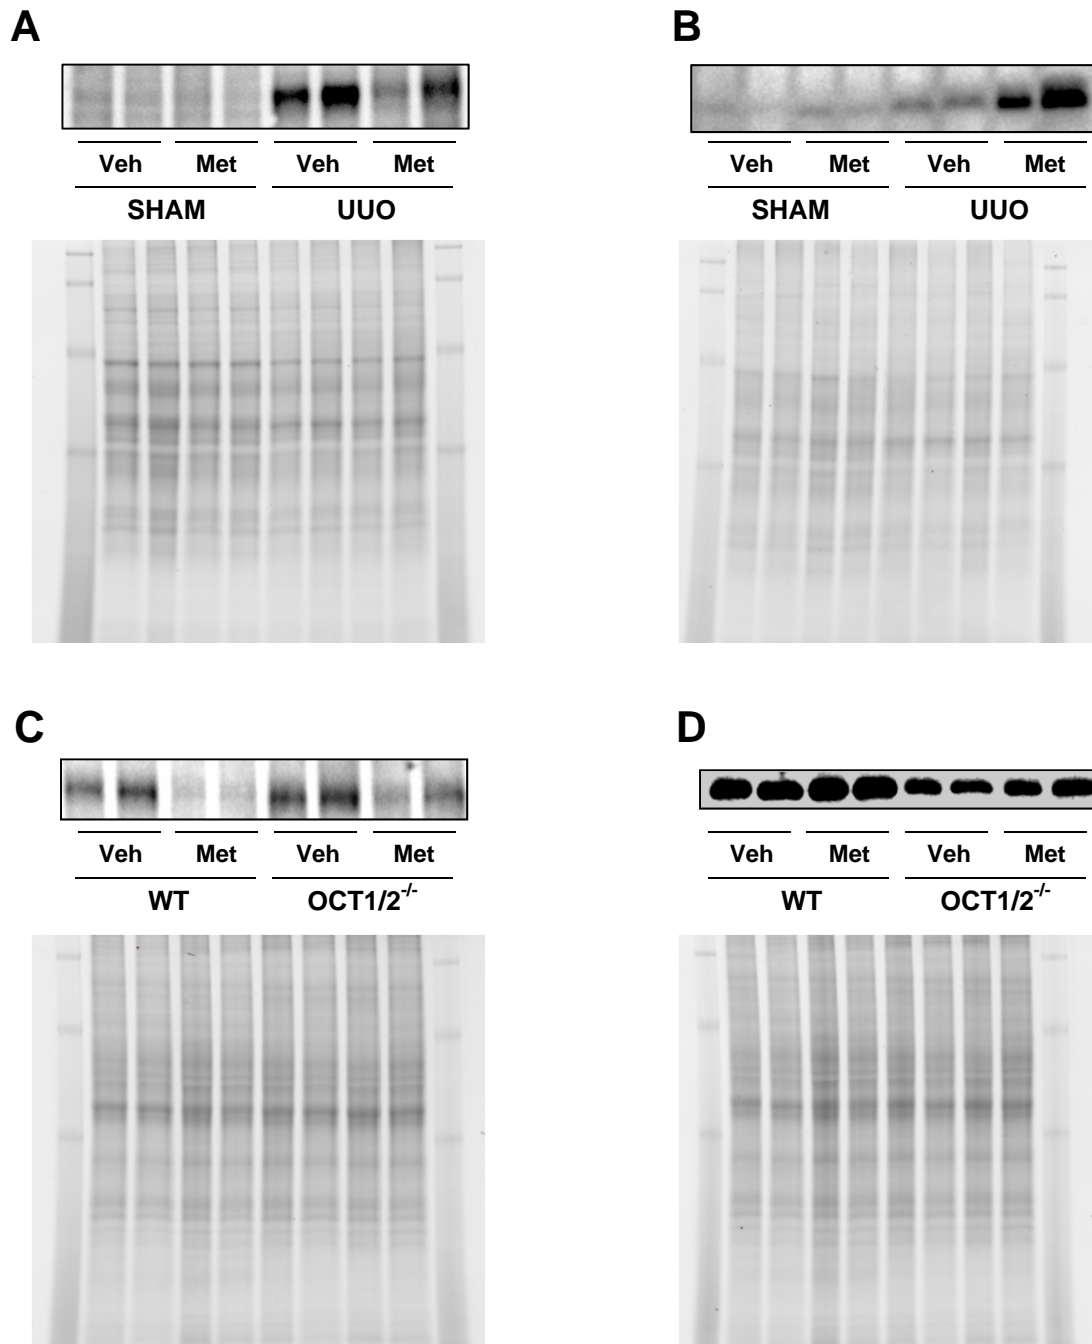

**Supplementary figure 3 – Total protein gels for western blots in figure 3, 4 and 5.** Western blots with corresponding total proteins. A: KIM-1 from figure 3, B: HO-1 from figure 4, C: KIM-1 from figure 5 and D: HO-1 from figure 5.
